# Supplementary material for: ‘Shared-Hook’ and ‘Changed-Hook’ Binding Activities of Herpesviral Core Nuclear Egress Complexes Identified by Random Mutagenesis
Source: MDPI journal article supplement (doi:10.3390/cells11244030), 2022-12-13
Supplement: s1 [file s1]

# Supplementary materials

## 'Shared-hook' and 'changed-hook' binding activities of herpesviral core nuclear egress complexes identified by random mutagenesis

Josephine Lösing<sup>1</sup>, Sigrun Häge<sup>1</sup>, Martin Schütz<sup>1</sup>, Sabrina Wagner<sup>1</sup>, Julia Wardin<sup>1</sup>, Heinrich Sticht<sup>2</sup> and Manfred Marschall<sup>1,\*</sup>

<sup>1</sup> Institute for Clinical and Molecular Virology, Friedrich-Alexander-Universität Erlangen-Nürnberg (FAU), 91054 Erlangen, Germany; josi.loesing@fau.de, sigrun.haegel@fau.de, martin.schuetz@uk-erlangen.de, sabrina.wagner@uk-erlangen.de, julia.wardin@fau.de, manfred.marschall@fau.de

<sup>2</sup> Division of Bioinformatics, Institute of Biochemistry, Friedrich-Alexander-Universität Erlangen-Nürnberg (FAU), 91054 Erlangen, Germany, heinrich.sticht@fau.de

\* Correspondence: manfred.marschall@fau.de, Tel.: +49-9131-85-26089

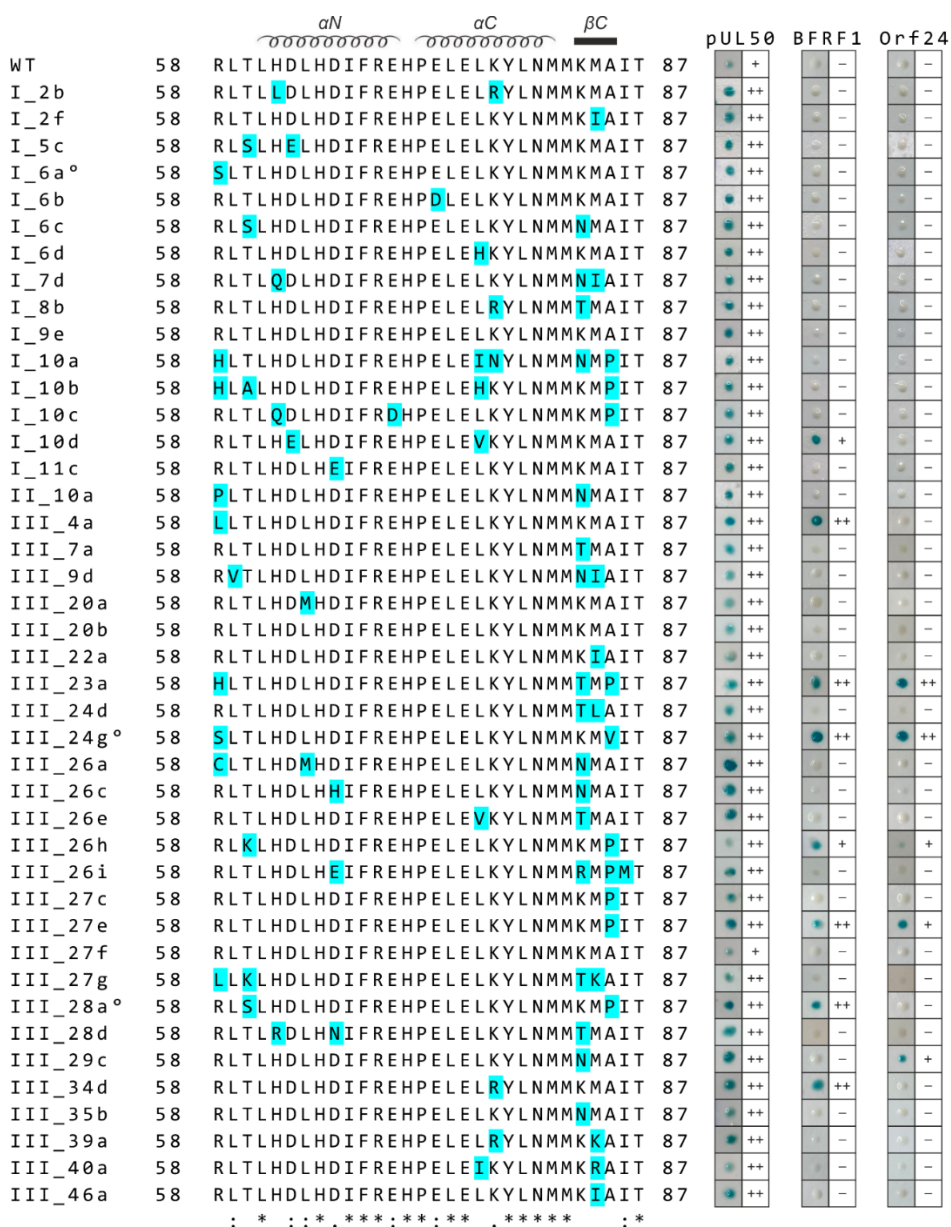

**Figure S1.** Sequence alignment: Y2H data comparing the hook region of WT pUL53 and library clones derived from the primary screening of Lib1 with HCMV pUL50 referring to their shared-hook binding properties with three different groove proteins. Amino acid sequences of the WT pUL53 hook region (amino acids 58–87) and the library clones listed below were aligned using the online multiple sequence alignment tool ClustalW2. Mutated residues are highlighted in cyan. °, indicates further amino acid exchanges were detected upstream the hook region (i.e. A55T for clone I\_6a, A43T for III\_24g and R18S for III\_28a); \*, positions of fully conserved residues; ;, positions conserved within groups of strongly similar properties (i.e. scoring > 0.5 in the Gonnet PAM 250 matrix); ., positions conserved within groups of weakly similar properties (i.e. scoring ≤ 0.5 and > 0 in the Gonnet PAM 250 matrix). In the Y2H analysis, pUL53 library clones were identified by primary screening against HCMV pUL50. All primary positive clones were then used for a retransformation-based confirmation step and shared-hook analysis against HCMV pUL50, EBV BFRF1, or VZV Orf24, respectively, as shown at the right. The positivity rate of blue yeast colonies detected in the Xgal filter lift assay is indicated: ++, ≥ 50%; +, < 50%; –, not detectable.

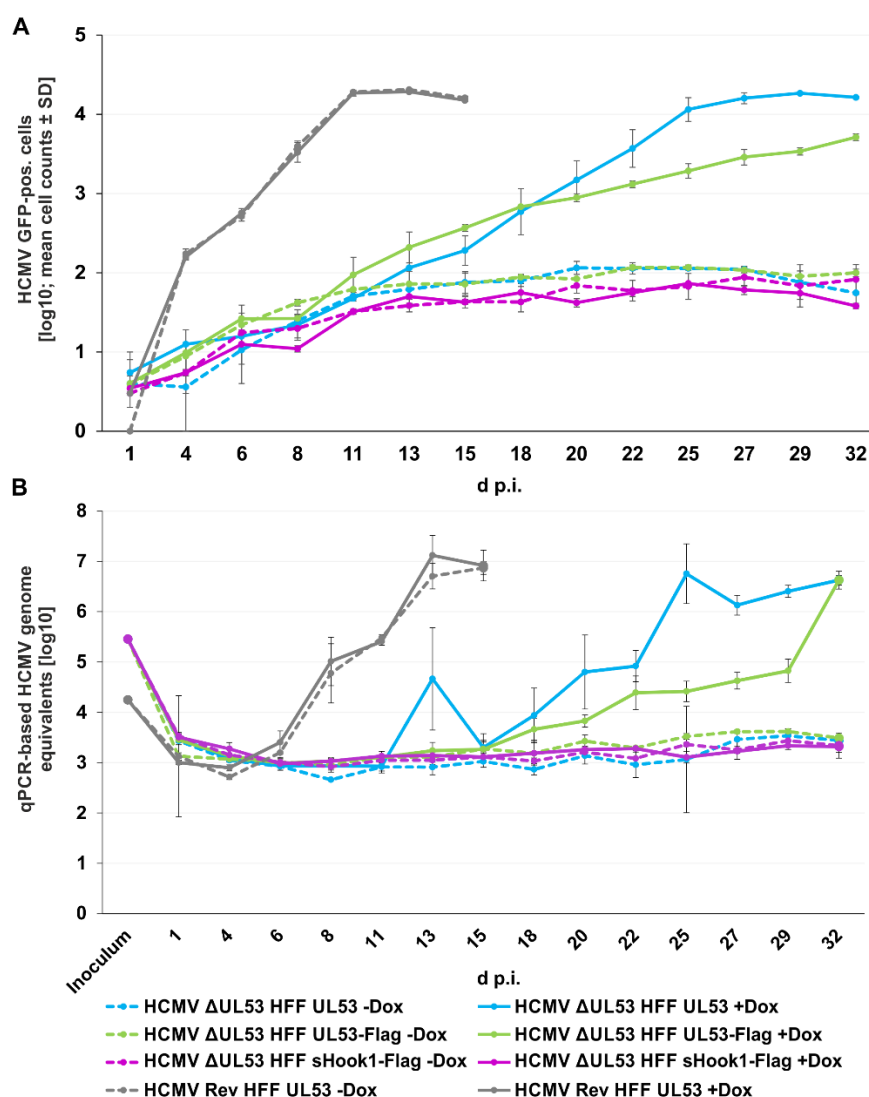

**Figure S2.** Viral replication kinetics of HCMV  $\Delta$ UL53 and its revertant (HCMV Rev) determined by quantitation of GFP-positive cells and HCMV-specific qPCR on the different recombinant HFF populations. 80,000 inducibly expressing HFFs in 24-well plates were infected with HCMV  $\Delta$ UL53 or HCMV Rev at a viral dose of  $5 \times 10^6$  genome copies without removing the viral inoculum after adsorption. pUL53, pUL53-Flag or pUL53::sHook1-Flag protein expression was either Dox-induced (+Dox) or remained non-induced (-Dox). **(A)** The number of HCMV-infected cells was measured by detection of GFP signal-positive cells at indicated time points with the CellReporterXpress® software using the ImageXpress® Pico device. Values represent 25.04 % of the area of a well and are given as a mean value  $\pm$  SD of two independently infected wells. **(B)** Viral supernatants were harvested at indicated time points and viral genome equivalents were determined by qPCR. Each value represents the mean  $\pm$  SD of two independent biological replicates, each measured twice.

**Table S1.** Oligonucleotide primers used in this study.

| Primer                                  | Sequence (5'→ 3')                                                                                  |
|-----------------------------------------|----------------------------------------------------------------------------------------------------|
| 5-BamHI-EcoRI-UL53                      | TAG GGATCC GAATTC ATGTCTAGCGTGAGC                                                                  |
| 3-PstI-XhoI-Stop-Flag                   | TAG CTGCAG CTCGAG TCA CTGTGTCGTCATCGTC                                                             |
| 5-sHook-UL53::BFLF2 Overlap<br>aa 63-94 | TTCCACAGGATCTTCCGCGCCCACTTTGAACTGGAGCTCAAGTTTCTTCG-<br>TATGATGAAGACCCCCATCCATGGCAAAGAGTCCATCTGCTTA |
| 3-sHook-UL53::BFLF2 Overlap<br>aa 78-48 | AAACTTGAGCTCCAGTTCAAAGTGGGCGCGGAAGATCCTGTGGAAGTCCCG-<br>CAGCGTGAGGCGGGATCTGTCTGTCGGCCGCGACGGCGGTTC |
| 5-sHook-UL53::Orf27 Overlap<br>aa 63-94 | CTGTTTGACATCATCGCAGAGCACCCCGAACTGGAGCTCAAGTACCTTA-<br>GAATGATGAAGATGCCAATCATTGGCAAAGAGTCCATCTGCTTA |
| 3-sHook-UL53::Orf27 Overlap<br>aa 78-48 | GTACTTGAGCTCCAGTTCGGGGTGCTCTGCGATGATGTCAAACAGGTCGTGG-<br>TACACGAGCCGCTCCTTTGAGTCGGCCGCGACGGCGGTTC  |
| 5-BFLF2 EcoRI                           | TAG GAATTC ATGGCCCCGGTCAC                                                                          |
| 3-BFLF2 PstI                            | TAG CTGCAG CTACTGTTTATTTTC                                                                         |
| 5-Orf27 EcoRI                           | TAG GAATTC ATGCATTTAAAG                                                                            |
| 3-Orf27 PstI                            | TAG CTGCAG TCACCGAGGAGGAAC                                                                         |
| 5-BFRF1 EcoRI                           | TAG GAATTC ATGGCGAGCCCCGGAAGA                                                                      |
| 3-BFRF1(1-315) PstI                     | TAG CTGCAG TCAAGGTGTGGCGCGCCAAG                                                                    |
| 5-Orf24 EcoRI                           | TAG GAATTC ATGTCACGGAGAAC                                                                          |
| 3-Orf24(1-247) PstI                     | TAG CTGCAG TTAGTTAGCTACGGGTAG                                                                      |
| 5-UL53-EcoRI                            | TAG GAATTC ATGTCTAGCGTGAG                                                                          |
| 3-UL53(1-87)-Flag XhoI PstI             | TAG CTGCAG CTCGAG CTACTTGTCGTCATCGTCTTTGTAGTC<br>CGTGATGGCCATCTTC                                  |
| 5-HA-BFRF1 EcoRI                        | TAG GAATTC ATG TACCCATACGATGTTCCAGATTACGCT GC<br>GAGCCCCGGAAGAG                                    |
| 3-BFRF1(1-315) XhoI                     | TAG CTCGAG TCAAGGTGTGGCGCGCCAAG                                                                    |
| 5-HA-Orf24 EcoRI                        | TAG GAATTC ATG TACCCATACGATGTTCCAGATTACGCT TC<br>ACGGAGAACGTATGTAC                                 |
| 3-Orf24(1-247) XhoI                     | TAG CTCGAG TTAGTTAGCTACGGGTAG                                                                      |
| 5-pUL50-1-EcoRI                         | TGA GAATTC ATG GAGATGAACAAGGTTCTCCATC                                                              |
| 3-UL50(1-358) PstI                      | TAG CTGCAG TCACCACGGCCCAGACTG                                                                      |
| 3-UL53 PstI                             | TAG CTGCAG TCAAGGCGCACGAATG                                                                        |
| 5-HA-UL34 HindIII                       | TAGAAGCTTATGTACCCATACGATGTTCCAGATTACGCTGCGGGACTGGG-<br>CAAGC                                       |
| 3-UL34 XhoI                             | TAGCTCGAGTTATAGGCGCGCGCCAGCAC                                                                      |
| 5-Flag-UL31 HindIII                     | TAGAAGCTTATGGACTACAAAGACGATGACGACAAGTATGACAC-<br>CGACCCCCATC                                       |
| 3-UL31 XhoI                             | TAGCTCGAGCTACGGCGGAGGAAAC                                                                          |
| 5-UL53-attB1                            | GGGGACAAGTTTGTACAAAAAAGCAGGCTACCATGTCTAGCGTGAG                                                     |
| 3-UL53-attB2                            | GGGGACCACTTTGTACAAGAAAGCTGGGTTCAAGGCGCACGAATGC                                                     |
| 3-UL53-Flag-attB2                       | GGGGACCACTTTGTACAAGAAAGCTGGGTTCACTTGTCTGTCATCGTCTTT-<br>GTAGTCAGG                                  |
| 5' a-b-c-Kana                           | GCTGGTGGACCCACGTACGTGATAGA-CAAGTATGTCTAGTCAACAG-<br>CATTCGTGCGCCTTAGGGATAACAGG                     |
| 3' b-c-d-Kana                           | TTTTCTGCCGTACAGTGTCAAGGCGCACGAATGCTGTTGACTAGACATACTT-<br>GTCTATCAGCCAGTGTTACAACC                   |

**Table S2:** Protein expression levels of HeLa and 293T cells given as mean values  $\pm$  SD signal-positive cells.

|        |       | HeLa         | 293T         |
|--------|-------|--------------|--------------|
| sHook1 | pUL50 | 8 $\pm$ 6%   | 26 $\pm$ 9%  |
|        | BFRF1 | 11 $\pm$ 3%  | 32 $\pm$ 16% |
|        | Orf24 | 24 $\pm$ 16% | 19 $\pm$ 10% |
| sHook2 | pUL50 | 10 $\pm$ 4%  | 25 $\pm$ 6%  |
|        | BFRF1 | 7 $\pm$ 2%   | 44 $\pm$ 22% |
|        | Orf24 | 14 $\pm$ 6%  | 34 $\pm$ 7%  |
